1  
2  
3  
4  
5  
6  
7  
8  
9  
10  
11  
12  
13  
14  
15  
16  
17  
18  
19  
20  
21  
22  
23  
24  
25  
26  
27  
28  
29

Perceptions of Water Security and Climate Change in Lima, Peru: Qualitative Study of Mothers and Healthcare Providers

Danna Obregon Morales<sup>1¶</sup>, Karen Ramos<sup>1¶\*</sup>, Elena Jauregui<sup>2</sup>, Milagros Dueñas<sup>1</sup>, Nancy Rumaldo<sup>1</sup>, Shruti Gogia<sup>2</sup>, Leonid Lecca<sup>1,4</sup>, Sonya S. Shin<sup>3,4</sup>

<sup>1</sup> Socios En Salud, Sucursal Peru, Lima, Peru

<sup>2</sup> Harvard School of Public Health, Boston, Massachusetts, United States of America

<sup>3</sup> Division of Global Health Equity, Department of General Medicine, Brigham and Women’s Hospital, Boston, Massachusetts, United States of America

<sup>4</sup> Department of Global Health and Social Medicine, Harvard Medical School, Boston, Massachusetts, United States of America

\* Corresponding author  
E-mail: [kramos\\_ses@pih.org](mailto:kramos_ses@pih.org)

¶ These authors contributed equally to this work.

30 **Abstract**

31 Background: Water insecurity, a global public health crisis, will be intensified by climate change.  
32 In coastal Peru, little is known about the health effects of water insecurity from a community  
33 perspective. Understanding first-hand experiences and perceptions of mothers and healthcare  
34 providers can inform strategies to mitigate the effects of water insecurity and climate change  
35 on health outcomes and health disparities.

36  
37 Methods: This qualitative study took place in 2023 in Carabayllo, the Northernmost region of  
38 Lima, Peru comprised of urban and rural communities. We conducted six focus groups with 10  
39 pregnant women and 23 mothers of children ages 0 to 10, as well as individual interviews with  
40 22 healthcare providers. Data were analyzed through rapid qualitative analysis combining  
41 deductive and inductive methods.

42  
43 Principal findings: Water insecurity was common among community members and was  
44 normalized as part of daily life. Access to water varied based on socioeconomic status and  
45 geography. Perceived health impacts were primarily related to hygiene and sanitation (e.g.  
46 diarrheal disease), water storage (dengue), and longer-term effects such as nutrition and child  
47 development. Respondents agreed that climate change would exacerbate water insecurity and  
48 endorsed strategies to take action.

49  
50 Conclusions and significance: The lived experiences of water insecurity and its health impacts in  
51 Lima, Peru highlight the importance of mobilizing community stakeholders, health systems and  
52 local government to increase water security and support healthcare facilities and communities  
53 on water conservation and climate preparedness efforts.

54

## 55 Introduction

56

57 Approximately 2.2 billion people worldwide lack access to safely managed drinking water, with  
58 a significant concentration of this burden in LMICs (1). Climate change has exacerbated this  
59 crisis, leading to increased water scarcity, irregular precipitation patterns, and extreme weather  
60 events (2). The United Nations predicts climate change will further intensify water insecurity,  
61 affecting up to 3.2 billion people by 2050 (3).

62

63 In Peru, only 50% of the population has access to safe water (4). Drinking water availability  
64 varies across geographic regions: 92% of urban populations have access to potable water,  
65 compared with 79% of residents in rural areas (5). In terms of health consequences, mortality  
66 from inadequate water and sanitation services is disproportionately higher in the jungles and  
67 highlands compared to coastal regions; on the other hand, the dry coastal regions are the most  
68 vulnerable to climate-related water scarcity and immigration (6). According to the World Bank,  
69 despite ample renewable water resources, Peru's water stress is largely driven by inadequate  
70 water infrastructure, population growth, and excessive water use by agricultural and industrial  
71 (e.g. manufacturing, mining) sectors (6).

72

73 Whereas lived experiences and perceptions among community members have been explored in  
74 other regions of Peru (7, 8), there is a paucity of individual experiential and perceptual data  
75 among urban, coastal Peruvian communities with respect to water security and climate change  
76 (9, 10). Understanding community members' lived experiences with water security and

77 awareness of climate change implications could help to assess community readiness and inform  
78 policy decisions and community-led strategies to mitigate future health effects of climate change,  
79 particularly related to water scarcity.

80

81 To address this gap, we conducted a qualitative study to explore community perspectives of  
82 water insecurity and its impact on maternal child health in Carabayllo, the Northernmost region  
83 of Lima, Peru. We sought to understand direct experiences of water insecurity, as well the  
84 perceived relationship of water insecurity to climate change and health outcomes from the  
85 perspectives of community members (mothers and pregnant women) as well as healthcare  
86 providers working in the region. In addition, we sought to identify existing strategies to mitigate  
87 the effects of climate change and water insecurity, implemented at household, community and  
88 governmental levels.

89

## 90 **Materials and Methods**

91

### 92 **Study design and participants**

93

94 This study was nested within a broader community needs assessment to characterize the supply  
95 and demand of healthcare services among pregnant women and children ages 0 to 10 in  
96 Carabayllo, Lima. The needs assessment was designed and carried out by Socios En Salud, a non-  
97 governmental organization operating in Carabayllo since 1995, to inform future programming.  
98 SES operates numerous community-based initiatives, many of which rely on community health

99 workers (CHWs) and mobile technology to provide accompaniment support for various health  
100 conditions including maternal health, early child development and nutrition (11-13).  
101 Recognizing the intersection of climate health and water insecurity with these conditions, as  
102 well as the lack of relevant data pertaining to this population, we embedded additional  
103 questions into the needs assessment.

104  
105 The study population included healthcare providers, pregnant women, and caregivers of  
106 children aged 0 to 10. Four healthcare establishments were selected among a total of 12 health  
107 establishments in Carabayllo to represent different facility types and populations served: one  
108 health post in a rural community, two health posts serving urban regions, and a health center in  
109 an urban neighborhood (14). For the needs assessment, pregnant women and children  
110 receiving care at these establishments were identified through chart review to generate a list of  
111 individuals who met eligibility criteria (pregnant woman or child aged 0 to 10). Pregnant women  
112 and caregivers of children were recruited to take part through community outreach, in which  
113 CHWs invited candidates to take part in the needs assessment, which involved a survey  
114 followed by focus groups with a subset of survey respondents.

115  
116 Among individuals who completed the community survey, those who actively engaged in the  
117 survey (e.g. provided longer responses to open-ended questions, expressed enthusiasm for  
118 taking part in the survey) were consecutively invited to participate in focus groups. Those who  
119 expressed interest were provided the time and place of the group interview. A total of 10

120 participants were invited to each group interview (60 recruited in total), and the interview took  
121 place regardless of how many people showed up.

122

123 For healthcare providers, we conducted one-on-one interviews and used purposive sampling  
124 for diverse professional representation at each facility. We recruited the main provider caring  
125 for pregnant women and children in each of the following professions: nutritionist, obstetrician,  
126 head physician, odontologist, psychologist and nurse. Of note, in smaller facilities such as  
127 health posts, not all professions were present. In addition, three healthcare providers (two  
128 obstetricians and one nurse) working at the Ministry of Health District level were interviewed.

129

### 130 **Study setting**

131 Located in the northernmost region of Lima, Carabayllo comprises 347 square kilometers, and  
132 has a population of 333,039 people (15). Given its location on the periphery of the capital city,  
133 Carabayllo represents a mix of urban and rural areas, including expanding neighborhoods fed by  
134 a continuous influx of immigrants from within and outside of the country. As Carabayllo has  
135 expanded, newer settlements (“asentamientos humanos” or if settled without permission  
136 “invasiones”) are typically located on steep, rocky hillsides (“cerros”) with minimal vegetation or  
137 infrastructure. As settlements gain formal recognition, they also obtain rights to municipal  
138 infrastructure such as water and electricity. More established communities (“urbanizaciones”)   
139 are typically more developed, with paved roads, local businesses such as shops and markets,  
140 and housing infrastructure such as paved floors, concrete construction, electricity and  
141 plumbing. Where services are available in Lima, the water utility company (Sedapal) provides

142 potable water for a cost (16). The monthly household cost for water ranges from 10 to 300 (\$3-  
143 79 USD), averaging 45 soles or approximately \$12 USD (internal data).

144

## 145 **Data collection**

146

147 The study team developed the following interview questions to explore experiences of water  
148 shortages, understandings of climate change and its relationship to water access, impacts of  
149 water insecurity and/or climate change on maternal child health, and practices to adapt to  
150 water scarcity in the face of climate change: *Have you ever had a time when your [family /*  
151 *community] did not have enough water to drink and use? [probe: if yes, describe]; What do you*  
152 *understand when you hear the words climate change? [if not spontaneously mentioned, probe*  
153 *perceived relation to water access]; Climate change can sometimes cause water problems*  
154 *including damage from flooding or water shortages due drought and heat. Do you feel that your*  
155 *[family / community] has been affected by climate change? [probe: if yes, describe]; Regardless*  
156 *of climate change, we know that Peru’s communities are resilient and have survived periods of*  
157 *drought over centuries. Does your [family / community] have any practices to conserve water or*  
158 *manage during times of water scarcity? [probe: if yes, describe]. For women and caregivers, we*  
159 *used the term “your family,” whereas for healthcare providers, we used “your community,”*  
160 *referring to residents of the catchment served.*

161

162 A trained Peruvian study staff (DO) conducted all interviews in Spanish; this individual had no  
163 prior relationships with study participants. Interviews took place in-person at the health centers

164 and community centers (“casas comunitarias de salud”) and were audio-recorded. We used  
165 rapid qualitative methods to analyze the interviews using a deductive-inductive approach.  
166 Rapid qualitative methods were utilized to complete the analysis within the study time-frame  
167 available and small research team. Two coders – one Native Spanish speaker (EJ) and one non-  
168 Native Spanish speaker (SSS) – established a draft codebook based on *a priori* domains (e.g.  
169 first-hand experience of water scarcity; perceived relationship of climate change with water  
170 shortages; health effects of water scarcity). Each coder then reviewed audio-recordings of 3-4  
171 interviews, using the draft codebook to identify themes within each domain, tagging relevant  
172 citations using audio-recording timestamps. The interviewer and coders then met to review and  
173 refine the codebook to incorporate themes using an inductive approach. For example, under  
174 the domain “first-hand experience of water stress/scarcity,” the following themes were  
175 identified: variability in water supply based on geographic region, changes in water supply over  
176 time, interruptions/unreliability in water supply, diminished water security due to heat. The  
177 final codebook (**Table 1**) was then used by a single coder (SSS) to analyze all interviews, flagging  
178 all coded excerpts with timestamps. Coded excerpts were then translated and anonymized. All  
179 translations were reviewed and edited by a Native Spanish speaker (DO, EJ). While sampling  
180 was determined by funding rather than saturation, the analysis team did feel that we reached  
181 saturation among both participant groups.

182

183 **Table 1: Domains and themes**

| Domain                         | Theme                                                  |
|--------------------------------|--------------------------------------------------------|
| Water infrastructure and water | Variability in water supply based on geographic region |



|                                                        |                                                                                               |
|--------------------------------------------------------|-----------------------------------------------------------------------------------------------|
| security                                               | Changes in water supply over time                                                             |
|                                                        | Interruptions/unreliability in water supply                                                   |
|                                                        | Diminished water security due to heat                                                         |
| Impacts of climate change on water security and health | Climate change exacerbates water insecurity                                                   |
|                                                        | Extreme weather events                                                                        |
| Maternal child health Impacts of climate change        | Importance of water for overall health                                                        |
|                                                        | Inadequate hygiene / Contaminated water                                                       |
|                                                        | Dengue                                                                                        |
|                                                        | Poor nutrition                                                                                |
|                                                        | Respiratory infections                                                                        |
|                                                        | Mental health                                                                                 |
|                                                        | Impact of water on disruption of health services                                              |
| Water stewardship practiced in the community           | Water collection and conservation practices                                                   |
|                                                        | Water stewardship practices recalled from participant’s original communities (e.g. provinces) |
|                                                        | Collective community-level responses                                                          |
|                                                        | Importance of increased awareness                                                             |
|                                                        | Governmental / public sector initiatives                                                      |

184

185 The core team (EJ, SSS, DO) met frequently throughout the analysis phase to confirm

186 consistency and coherence of domains and themes, collectively identify key findings, select

187 illustrative quotes, and relate themes into an overall schema. Preliminary findings including the

188 overall schema were shared with the broader study team (DO, KR, EJ, MD, NR, LL, SG, JSP) for  
189 further feedback, interpretation and reflections.

190

## 191 **Ethical considerations and positionality**

192

193 Study participants provided written informed consent for data collection and received a healthy meal as  
194 for compensation for their time. The cost of transportation to attend focus groups was also covered.

195 Ethics committee approvals were obtained from Mass General Brigham (2023P002227) and Vía libre

196 (022-2023) Institutional Review Boards. The study team – five Peruvian staff of Socios En Salud, two

197 Public Health Masters students (one Peruvian, one non-Peruvian) and a non-Peruvian clinician-

198 researcher with 29 years of experience working in Peru – carried out the study including study design

199 (KR, MD, NR, SS, LL), data collection (DO), analysis (EJ, DO, SS), interpretation of study findings (DO, KR,

200 EJ, MD, NR, SG, LL, SS, JSP), manuscript preparation (SG, SS, DO) and manuscript review (all authors).

## 201 **RESULTS**

202

203 From August 22 through September 27, 2023, we conducted six focus groups and 26 individual

204 interviews. Ten pregnant women took part in three focus groups and 23 caregivers of children

205 aged zero to ten years old participated in three focus groups (Table 2). The median ages among

206 pregnant women and caregivers were 28.5 years (interquartile range 23-34) and 32

207 (interquartile range 27-38), respectively. Although male caregivers were eligible to take part, all

208 caregivers were mothers; for this reason, herein, we refer to the cohort of pregnant women

209 and caregivers as “mothers.” In addition, 22 healthcare providers (four nurses, four physicians,

210 three nutritionists, six obstetricians, four odontologists and one psychologist) were  
211 interviewed.

212

213 **Table 2: Participant summary**

| Participant             | Health Post A<br>(urban) | Health Center B<br>(urban) | Health Post C<br>(urban) | Health Post D<br>(rural) | Northern<br>Lima District | #<br>participants |
|-------------------------|--------------------------|----------------------------|--------------------------|--------------------------|---------------------------|-------------------|
| Nutritionist            | 1                        | 1                          |                          | 1                        |                           | 3                 |
| Obstetrician            | 1                        | 1                          | 1                        | 1                        | 2                         | 6                 |
| Odontologist            | 1                        | 1                          | 1                        | 1                        |                           | 4                 |
| Physician               | 1                        | 1                          | 1                        | 1                        |                           | 4                 |
| Psychologist            |                          | 1                          |                          |                          |                           | 1                 |
| Nurse                   | 1                        | 1                          | 1                        |                          | 1                         | 4                 |
| Pregnant woman          | 3                        | 6                          |                          | 1                        |                           | 10                |
| Mother of 0-10 year old | 6                        | 5                          | 6                        | 6                        |                           | 23                |

214

## 215 **Water infrastructure and water security**

216

217 Most communities described challenges with water, which varied based on geography and  
218 water source. More established zones (“urbanizaciones”) tended to have constant water  
219 supply, whereas less developed zones, such “asentamientos humanos” located on the hills  
220 (“cerros”) of Lima’s periphery, were more susceptible to interruptions in municipal water  
221 supply and unreliable water pressure when filling community cisterns or tanks. Other sites  
222 lacked any water infrastructure, and families had to pay for water delivered by truck. Another  
223 challenge for informal communities (“invasiones”) was the lack of governmental recognition  
224 and planning to have formal water systems installed by Sedapal. The degree of water access

225 also reflected socioeconomic disparities, with more affluent communities and households  
226 tending to have more reliable access.

227

228 *Yes, we've had problems, mostly because I live way up ("arriba"), we have always suffered for*  
229 *water, because the supply from cisterns don't last. They [water trucks] only come every two*  
230 *weeks or at the end of the month. And if maybe you aren't there and you miss a filling, they*  
231 *don't fill your tank and then you're stuck because you have to really measure your water. And*  
232 *if you run out in those 15 days, who's going to give you water? Nobody. So, I've suffered this.*  
233 *Once I went for a month without water. I have a brother-in-law who lives close to the wall. I*  
234 *had to carry water from down there to way up high in buckets. - Mother of 6 to 10 year-old*  
235 *seen at health post (FGM3 #4)*

236

237 *In the higher zones, [residents] don't have access to water. They have to buy water or use a*  
238 *cistern [transported by truck] which has to travel up the hill, up to a certain point, because*  
239 *even beyond, there are dirt hills where cisterns can't reach. - Obstetrician at urban health post*  
240 *(OB4)*

241

242 While providers and community members generally felt that water supply had improved over  
243 time, communities in less developed regions did not have consistent access to running water.  
244 Households only had running water during certain times of day and would typically store water  
245 in containers for use throughout the rest of the day. Interruptions in water service could occur  
246 without warning and remain for unpredictable lengths of time. Periods of heat also affected

247 water availability, causing dry wells or lower water levels in cisterns. Experiences of water  
248 scarcity were often normalized such that respondents simply described water scarcity or  
249 unreliability as a part of their routine lives.

250

251 *In the past, those things [water shortages] happened, but it would start in the middle of the*  
252 *night, they would shut off the water so that there'd be water during the day. From this time to*  
253 *that time of day in this district, there's water; in another district, no... that's how they started*  
254 *to ration water, but it's not that we don't have water all day. In the past, yes, there was water*  
255 *scarcity, but now not so much. - Obstetrician at Northern Lima District (OB2)*

256

257 *Unexpectedly, sometimes you go to the market, then you get back to your house and there's*  
258 *no water... You don't know exactly [sometimes] there's water all day, [other times] we wait for*  
259 *water to come back... two hours, three hours, sometimes it returns the following day. -*

260 Mother of 0 to 5 year-old seen at health post (FGM1 #5)

261

262 *We don't have running water, so we use a well ("pozo"). When it's hot, the well doesn't have*  
263 *water... January, February [summer months in Peru]. They have to bring a pump and try to*  
264 *pump up more water. This goes on for several months, the hottest months. And then we have*  
265 *to go down to collect water because there isn't enough pressure to get the water up to our*  
266 *homes. - Pregnant woman seen at health center (FGG1 #3)*

267

268 **Perceived relationship of climate change and water security**

269

270 While a few respondents did not perceive current impacts of climate change on water-related  
271 health issues, most noted connections. When asked how climate change related to water  
272 scarcity, healthcare providers and community members often referred to rain shortages,  
273 increased temperatures, and drought occurring in Lima and other regions of Peru. Respondents  
274 noted that these manifestations of climate change caused environmental and agricultural  
275 problems, such as contaminated rivers and lack of water for irrigation, with subsequent effects  
276 on the availability and cost of food and ultimately on health. Several respondents speculated  
277 that climate change effects were likely to increase over time.

278  
279 *I've heard that's what they say, that climate change may cause scarcity of water. Especially in*  
280 *zones of poverty, it'll affect us even more. But I haven't witnessed first-hand experiences of*  
281 *climate change in this community [served by health establishment]. - Physician at urban*  
282 *health post (MED2)*

283  
284 *Obviously yes, climate change is very important; better put, yes, [climate change] can affect*  
285 *water supply. Here we live in Lima, no, because we have water that is always available. But in*  
286 *the provinces, they depend on water for their produce. Depending on the climate and*  
287 *weather, there's quite a bit of water scarcity. - Pregnant woman seen at health center (FGG2)*

288  
289 Providers and community members also perceived that climate change was associated with  
290 more frequent extreme precipitation events in Lima, resulting in flooding and mudslides. These  
291 events occasionally caused local destruction of homes and barriers to accessing healthcare,

292 especially for pregnant women. A few respondents noted the effects of extreme weather on  
293 crops, resulting in higher cost and reduced availability of food.

294

295 *When it rains too much, the mud starts to come and can take the houses. The mud is a*  
296 *problem, when it rains all night, where we live there, it is just mud. - Mother of 6 to 10 year-*  
297 *old seen at health post (FGM3 #7)*

298

299 *From the phenomenon of El Niño, yes, there were rains, and houses in many zones in*  
300 *Northern Lima (“Lima Norte”) were affected... In the case of [name of neighborhood] it was*  
301 *along the Rimac River, generally because [the river] rises and that’s when houses start to get*  
302 *flooded. Especially if your house isn’t concrete, definitely the rain’s going to get in and in the*  
303 *end, it can destroy your house, or from the mudslides (“huaicos”) that happened. -*

304 Obstetrician at Northern Lima District (OB1)

305

### 306 **Impacts of water insecurity and climate change on maternal child health**

307

308 Respondents viewed water as essential for health and wellbeing. Providers and community  
309 members identified multiple health conditions linked to water scarcity and poor water quality.  
310 Providers cited hygiene as a key factor, including one’s ability to wash hands and bathe, clean  
311 the house, and prepare food safely (e.g. washing produce, cleaning dishes). Mothers facing  
312 water scarcity prioritized water for drinking and cooking over use for bathing and household  
313 chores. These constraints in hygiene practices were linked with dermatologic and  
314 gastrointestinal problems, especially among children.

315

316 *Water is life, without it we can't do anything - we can't eat, washing, washing our hands.*

317 *Since the pandemic, we've learned the importance of washing hands, cleanliness ("aseo"),*

318 *food. Without water, we can be exposed to all types of illnesses. - Pregnant woman seen at*

319 *health center (FGG1 #2)*

320

321 *Non-potable water contributes to parasites which can affect pregnant women. Other forms*

322 *of gastroenteritis and other illnesses can affect pregnant women, affects their nutrition,*

323 *anemia, and the health of their baby. - Nutritionist at health center (NUT2)*

324

325 Both providers and community members also linked respiratory problems with climate change

326 (due to exposure to temperature fluctuations and extremes) and water insecurity (limiting

327 one's ability to clean resulting in increased pathogens and indoor allergens).

328

329 *Also, the environment [is affected by water scarcity]: without water, you can't clean and*

330 *there's going to be more dust which will cause respiratory problems especially with children*

331 *who are more allergic. Also, poor living conditions which could be conducive to a rise in*

332 *tuberculosis. - Physician in urban health post (MED2)*

333

334 *Climate change causes cough, colds, from the humidity. Especially the children, because they*

335 *don't wash their hands, and the humidity affects their cough, cold, especially because they*

336 *can get sick more rapidly. If they are outside, then by the night they could be coughing*



337 *because their defenses are weaker. I have to take all my children to school, even my baby,*  
338 *because there's nobody to take care of them.* - Mother of 6-10 year-old seen at health post  
339 (FGM3)

340  
341 *For pregnant women, the main thing I've seen is respiratory illness. More because of the*  
342 *cold, they close up in their houses, and there's less ventilation.* - Nutritionist at urban health  
343 post (NUT1)

344  
345 Both providers and mothers associated the recent surge in dengue with weather changes. The  
346 combined effect of higher temperatures and water scarcity has resulted in routine storage of  
347 water in unsealed containers. At the same time, heavy rain leaves stagnant collections of water.  
348 Most mothers were aware of practices (e.g. covering stored water) to prevent dengue, but  
349 even so sometimes observed larvae in their stored water. Given limited access, families still  
350 used contaminated water, although not for consumption. Providers described increased cases  
351 and noted particular concern regarding dengue among pregnant women.

352  
353 *Yes [lack of water] affects [patient health] because if we do a home visit, there are illnesses*  
354 *like dengue because they deposit their water in their containers ("bidon") or in open buckets.*  
355 *Then there are lot of illnesses, because you go to the homes and you'll see that there's no*  
356 *place to throw out water because there's no plumbing, or maybe there's stagnant water*  
357 *("agua detenida"), or maybe their container doesn't have a cover.* - Obstetrician at health  
358 center (OB3)

359

360 *If you don't cover the water, the water gets worms, and then you can't drink it, it's only good*  
361 *for washing. That happened to me, my husband left [the water container] open, and I found*  
362 *little worms, like little fish.* - Mother of 6-10 year old seen at health post (FGM3)

363

364 *Now we have a sealed tank so that mosquitos can't enter. We used to have covered buckets*  
365 *("baldes") but even so, mosquitos contaminated the water.* - Pregnant woman seen at  
366 health center (FGG1)

367

368 Nutritional deficiencies were also described by providers and mothers, including anemia,  
369 especially among children. Dietary deficiencies were associated with water scarcity and climate  
370 change, both through malabsorption from parasitosis and rising food cost due to declining  
371 agricultural production.

372

373 *For children, the lack of water could cause problems with malnutrition, and potentially*  
374 *development, growth curve. We have seen a lot of children with anemia, similar to national*  
375 *rates.* - Nutritionist at rural health post (NUT3)

376

377 *In the zones that were heavily affected by rains and mudslides ("hauicos"), there has been a*  
378 *decrease in production and an increase in prices. This affects not just the zone where the*  
379 *food is produced, but also other areas... I've noticed the prices have risen too much, like the*  
380 *cost of onions and limes.* - Pregnant woman seen at health center (FGG1)

381

382 *For pregnant women, they require a balanced nutrition, and this is a zone with high need.*

383 *They need quality nutrition. If you don't have water, you can't meet your basic nutritional or*

384 *sanitary needs. In terms of nutrition, when there is no water, there is a lack of food*

385 *production... Also, when there are floods, this disrupts crops. This results in higher prices and*

386 *less supply and makes it harder for pregnant women to buy the foods to meet their*

387 *nutritional need. - Obstetrician at urban health post (OB4)*

388

389 Several providers noted that extreme weather and flooding disrupted access to healthcare

390 services. For instance, one provider described a pregnant woman who delivered in her home

391 because she was unable to travel to the health center due to rain and mud. Some providers also

392 speculated that health systems could face greater strains due to climate change, for which they

393 felt their systems to be ill-prepared.

394

395 *There were mudslides, and a delivery happened in the home because [the pregnant woman]*

396 *wasn't able to make it to the center. We had to make a home visit, and it was pure mud. We*

397 *were barely able to make it to her home, just imagine what it would be like for a pregnant*

398 *woman to get to the center. She could have come to the center earlier, but she waited and*

399 *didn't come in for care. We went to her on a home visit to help her get care at the Maternity*

400 *Center. There's a lack of access for us to get to the homes or vice versa. - Obstetrician at*

401 *urban health post (OB4)*

402

403 *In this zone, there isn't water: the water cuts off and comes only at certain hours. But we*  
404 *have a tank [in the health post] so the tank is filled and supplies us with water here. The*  
405 *problem comes when there's not enough water pressure to fill the tank above, or on the*  
406 *other hand, there's been 24 hours when there wasn't water. So, then there's no water. But*  
407 *it's very few times that that's happened. I can't see patients, the only thing I can do is offer*  
408 *palliative treatments since the machines operate on electricity and water. - Odontologist at*  
409 *urban health post (OD3)*

410

### 411 **Community responses to water scarcity and climate change**

412

413 When asked about water conservation measures, few participants could describe any activity  
414 that they currently practiced. Some women who had migrated from rural provinces described  
415 practices from their original communities, including collection of rain and surface water.  
416 However, since these sources of water were not available in Lima, these practices were no  
417 longer applicable. Similarly, at the community level, respondents were not aware of water  
418 conservation practices. Women stated they needed more resources or technology in order to  
419 adopt more conservation measures. For example, while one woman stated she was able to  
420 purchase a 2000-liter water tank for her home, other women were unable to afford such items.  
421 Finally, one woman described informal networks of support in her neighborhood to give water  
422 to each other when facing scarcity.

423

424 *I remember my grandmother... when it rained, since she had a thatched roof, she would put*  
425 *these large plastic containers (“tinajas grandes, latones de plástico”). When it rained in that*

426 *place, she'd let them fill up, let them sit out all night so the dirt settles. From there, she'd*  
427 *take only from the top, the water that was clean to use, the rest she'd throw out. That was*  
428 *when there were heavy rains, with thunder and everything. - Mother of 0-5 year-old seen at*  
429 *health center (FGM2 #4)*

430  
431 *The rainwater is stored, it is clear in the mountains. But here it's dirty. The air*  
432 *("medioambiente") here is polluted. People burn trash, the cars and traffic... the air is*  
433 *polluted and there's not a lot of rain. You can't compare it to the jungle. The quality of life, in*  
434 *terms of environment, is better in the jungle. The air there is pure. - Mother of 0-5 year-old*  
435 *seen at health post (FGM3)*

436  
437 *Some people are resourceful about this [conserving water], but they should have more*  
438 *resources and technology. - Pregnant women seen at health center (FGG2 #1)*

439  
440 *There are a lot of people who don't have [water]. They come and ask me for water. Since I*  
441 *rent, I have running water, so I would give them water. And sometimes I'd run out and then*  
442 *have to ask them for water. But since I gave them water, they'd give me water too. - Mother*  
443 *of 0-5 year-old seen at health post (FGM3 #5)*

444  
445 Healthcare providers acknowledged the need for increased awareness and communications  
446 related to climate change. This included both communications and preparedness at healthcare  
447 facilities and mass outreach to the community at large. Several District-level providers were

448 aware of governmental actions, including a cross-sector Ministry program to monitor water  
449 quality, plans to install underground cisterns for water storage, and programs to treat  
450 community water tanks with larvicides. By and large, however, local healthcare providers  
451 viewed climate change as outside their clinical purview and were unable to identify any type of  
452 coordinated cross-sector governmental or community response.

453  
454 *Climate change has a major role in the wellbeing and health of people. We are not prepared*  
455 *for what could come. We know about El Niño and mudslides (“huaicos”), we are aware of*  
456 *these, but there are deficiencies. We need more education and health promotion so that we*  
457 *are prepared to make changes. Getting prepared for extreme temperatures, especially for*  
458 *vulnerable populations, elders, pregnant women, people who are immunocompromised. I do*  
459 *think we should look at this and take up these activities of prevention and promotion to*  
460 *confront climate change in case it's not something temporary.* - Obstetrician at urban health  
461 post (OB4)

462

## 463 **Discussion**

464

465 This qualitative study conducted in Carabayllo, Lima, Peru, illuminates the intricate nexus  
466 between water insecurity, climate change, and maternal and child health (**Fig 1**). Lived  
467 experiences highlight the quotidian challenges posed by water scarcity, as well as the  
468 normalization of water insecurity as part of everyday life.

469

470 **Figure 1: Inter-relationship between climate change, water insecurity, and maternal child**  
471 **health**

472  
473 Our findings highlighted the repercussions of water scarcity on maternal and child health.  
474 Community members and healthcare providers observed acute health conditions (e.g.  
475 dermatological, gastrointestinal, respiratory) related to challenges in water, sanitation and  
476 hygiene, especially among children. In addition, longer-term effects of water scarcity on nutrition  
477 and child development were described. Effects of water insecurity on maternal and child health  
478 are well-described, reflecting the profound importance of access to clean water and sanitation  
479 on health and wellbeing (17-19). Water security is associated with improved child growth and  
480 development, as well as reduced under-five mortality; conversely, lack of potable water increases  
481 the risk of childhood diarrheal and dermatologic disease, stunting, maternal mortality, and  
482 vector-borne illnesses such as dengue (18, 20, 21). Furthermore, chronic under-hydration is  
483 associated with premature mortality and a spectrum of chronic diseases postulated to stem from  
484 accelerated aging (22).

485  
486 We observed geographical and socio-economic disparities in water security, with more developed  
487 urban areas enjoying relatively constant supply compared to less developed zones which must  
488 grapple with interruptions and unreliable pressure. Socioeconomic disparities in water insecurity  
489 are well-documented and are likely to increase with climate change (23). Water insecurity is  
490 determined by a constellation of factors including water availability, quality, infrastructure,  
491 affordability and territoriality (24). Territoriality, which refers to the ability of local government

492 to guarantee equitable access to water, requires both adequate water supply as well as political  
493 will for equitable distribution of resources (25). Prioritizing timely implementation of policies and  
494 strategies to ensure equitable access to safe drinking water is crucial, including infrastructure  
495 development directed toward the most vulnerable communities (4). In addition, identifying at-  
496 risk households and providing resources to increase water security and address underlying  
497 poverty could reduce health disparities (26).

498  
499 In our study, healthcare providers and mothers had varying perceptions of climate change  
500 impacts. While some perceived climate change as imminent, others viewed it as a distant concern  
501 that was likely to increase over time. These findings are consistent with prior studies carried out  
502 in Peru. In 2021, Torres-Slimming et al. examined perceptions of climate change among teenagers  
503 and key stakeholders in three Peruvian cities (Cusco, Piura and Loreto) and found that community  
504 members were able to identify extreme weather events related to climate change, and in  
505 particular, raised concerns about water insecurity (9). Similarly, a mixed-methods study  
506 conducted in Cusco on community perceptions of climate change revealed that water scarcity  
507 emerged as one of the most prominent issues associated with climate change (7). In this 2021  
508 study, some community members were able to describe adaptation strategies that could mitigate  
509 the long-term effects of climate change in their communities. In contrast, Sina et al interviewed  
510 Lima municipal officials in 2016 and reported limited awareness and understanding of climate  
511 change, along with low prioritization of climate change as a public health priority (10).  
512 Interestingly, a study of environmental practices among nurses in Northern coastal Peru found  
513 that most nurses practiced measures such as conserving energy use and recycling; the authors



514 highlight the importance of engage healthcare providers in adopting and modeling environmental  
515 practices as trusted role models in the workplace and community (27).

516

517 Despite common water shortages, few healthcare providers or mothers were currently practicing  
518 water conservation measures. Healthcare providers expressed collective unpreparedness for  
519 impending impacts of climate change on healthcare services, signaling a gap in institutional  
520 readiness and the need for proactive response. We perceived community readiness, as providers  
521 and community members expressed a need to raise awareness, build water conservation skills,  
522 and provide additional resources to support healthcare facilities and communities to promote  
523 water conservation and climate preparedness. The World Health Organization provides guidance  
524 to assess and advance climate preparedness of healthcare facilities (28). Contingencies for  
525 transportation and community-based delivery of care – especially for high-risk groups such as  
526 women, children and elders – could further enhance the resiliency of healthcare systems (29, 30).  
527 At the community level, mothers expressed the need for more resources and technology to  
528 implement effective water conservation measures, citing examples of water storage equipment  
529 that would protect household vulnerability to water scarcity. The strength of existing informal  
530 support networks – such as sharing water on the principle of reciprocity – could serve as a  
531 foundation to explore community-based water co-operatives.

532

533 This study from Lima, Peru contributes to a growing body of research by providing context-specific  
534 insight into the diverse ways that water insecurity influences maternal and child health, as well  
535 as the potential repercussions of climate change on this dynamic. Community readiness was

536 evident among mothers and healthcare providers, who supported raising community awareness,  
537 increasing water infrastructure and conservation practices, and preparing healthcare systems.  
538 Based on these findings, we describe potential strategies that could mitigate the negative impacts  
539 of climate change and water insecurity on health and wellbeing.

540

541 At the local governance level:

- 542 1. Provide subsidies on water storage and conservation tanks.
- 543 2. Prioritize investments in integrated water resource management.

544

545 At the health system level:

- 546 1. Train healthcare providers, administrators and community health workers to enhance  
547 knowledge of climate change and health impacts and their ability to identify and respond to  
548 local related health risks.
- 549 2. Assess climate preparedness of healthcare facilities and implement policies to increase  
550 resilience.
- 551 3. Develop surveillance capacity and early warning systems for climate-related health hazards  
552 e.g. dengue outbreaks.

553

554 At the community level:

- 555 1. Establish water cooperatives with infrastructure, financial and regulatory management  
556 carried out through community governance.

557 2. Promulgate knowledge-sharing and facilitate adoption of water conservation and safe  
558 storage.

559 3. Provide support to households experiencing water insecurity to facilitate access to  
560 healthcare and minimize water and food insecurity.

561  
562 Further discussions with community stakeholders, municipal leaders, and cross-sector Ministry  
563 leadership would be needed to identify optimal and feasible strategies.

564  
565 Our study has several limitations including a relatively small sample size, potentially limiting the  
566 generalizability of findings. Additionally, the qualitative nature of the study restricts our ability to  
567 confirm perceived relationships between water access and health outcomes. Despite these  
568 limitations, this study provides valuable insight, serving as a foundation for future quantitative  
569 research as well as intervention strategies to address the complex interplay of water scarcity,  
570 climate change, and maternal-child health.

571  
572 **Conclusion**  
573

574 Families in Carabayllo, Lima, currently experience water insecurity and perceived adverse effects  
575 on health, which is likely to increase with climate change. Cross-sector stakeholder engagement  
576 should identify suitable adaptive strategies to mitigate the impacts of water scarcity and climate  
577 change on maternal and child health. Once identified, these strategies can be implemented and  
578 evaluated for impact. Collaborative efforts between health departments, local governments, and

579 community stakeholders will be crucial for developing and implementing policies that enhance  
580 water infrastructure, promote sustainable practices, and build resilience in the face of climate-  
581 related challenges.

## 582 **Acknowledgments**

583  
584 We wish to acknowledge the community members and healthcare providers of Carabayllo who  
585 generously shared their time and experiences. We also wish to acknowledge the generous gift  
586 from Ronda Stryker to the Harvard Medical School Department of Global Health and Social  
587 Medicine's research core which made this work possible.  
588

## 589 **References**

- 590
- 591 1. Wolf J, Johnston RB, Ambelu A, Arnold BF, Bain R, Brauer M, et al. Burden of disease  
592 attributable to unsafe drinking water, sanitation, and hygiene in domestic settings: a global  
593 analysis for selected adverse health outcomes. *Lancet*. 2023;401(10393):2060-71.
  - 594 2. Water – at the center of the climate crisis. United Nations; 2024.
  - 595 3. United in Science report: Climate Change has not stopped for COVID19 [press release].  
596 United Nations September 9, 2020 2020.
  - 597 4. Hernandez-Vasquez A, Rojas-Roque C, Marques Sales D, Santero M, Bendezu-Quispe G,  
598 Barrientos-Gutierrez T, et al. Inequalities in access to safe drinking water in Peruvian  
599 households according to city size: an analysis from 2008 to 2018. *Int J Equity Health*.  
600 2021;20(1):133.
  - 601 5. (INEI) NIOSal. Peru: Forms of access to water and basic sanitation. 2016.
  - 602 6. Peru: Strategic Actions Toward Water Security. The World Bank  
603 Global Water Security and Sanitation Partnership; 2023.
  - 604 7. Brügger A, Tobias R, Monge-Rodríguez FS. Public Perceptions of Climate Change in the  
605 Peruvian Andes. *Sustainability*. 2021;13(5).
  - 606 8. Tallman PS, Collins SM, Chaparro MP, Salmon-Mulanovich G. Water insecurity, self-  
607 reported physical health, and objective measures of biological health in the Peruvian Amazon.  
608 *Am J Hum Biol*. 2022;34(12):e23805.
  - 609 9. Torres-Slimming PA, López Flórez L, Castañeda Checa K, Durand Galarza O, Tallman PS,  
610 Salmon-Mulanovich G. Explorando percepciones del impacto del cambio climático en tres  
611 regiones en el Perú *Revista Kawsaypacha Sociedad y Medio Ambiente*. 2021;8:101-17.
  - 612 10. Sina M, Wood RC, Saldarriaga E, Lawler J, Zunt J, Garcia P, et al. Understanding  
613 Perceptions of Climate Change, Priorities, and Decision-Making among Municipalities in Lima,  
614 Peru to Better Inform Adaptation and Mitigation Planning. *PLoS One*. 2016;11(1):e0147201.

- 615 11. Tzelios C, Contreras C, Istenes B, Astupillo A, Lecca L, Ramos K, et al. Using digital  
616 chatbots to close gaps in healthcare access during the COVID-19 pandemic. *Public Health*  
617 *Action*. 2022;12(4):180-5.
- 618 12. Miller AC, Rumaldo N, Soplapuco G, Condeso A, Kammerer B, Lundy S, et al. Success at  
619 Scale: Outcomes of Community-Based Neurodevelopment Intervention (CASITA) for Children  
620 Ages 6-20 months With Risk of Delay in Lima, Peru. *Child Dev*. 2021;92(6):e1275-e89.
- 621 13. Contreras C, Rumaldo N, Lindeborg MM, Mendoza M, Chen DR, Saldana O, et al.  
622 Emotional Experiences of Mothers Living With HIV and the Quest for Emotional Recovery: A  
623 Qualitative Study in Lima, Peru. *J Assoc Nurses AIDS Care*. 2019;30(4):440-50.
- 624 14. Analisis de Situación de Salud 2022: Direccion de Redes Integradas de Salud Lima Norte  
625 Peru Ministerio de Salud 2022.
- 626 15. Estadística Poblacional Peru Ministry of Health [Available from:  
627 [https://www.minsa.gob.pe/reunis/data/poblacion\\_estimada.asp](https://www.minsa.gob.pe/reunis/data/poblacion_estimada.asp).
- 628 16. ASIGNACIONES MAXIMAS DE CONSUMO - POR AGUA Y ALCANTARILLADO - GRUPO  
629 TARIFARIO 1  
630 DE 4: Sedapal; 2024 [Available from:  
631 [https://cdn.www.gob.pe/uploads/document/file/4242604/3989288-asignaciones-maximas-de-](https://cdn.www.gob.pe/uploads/document/file/4242604/3989288-asignaciones-maximas-de-consumo-2024.pdf?v=1705417674)  
632 [consumo-2024.pdf?v=1705417674](https://cdn.www.gob.pe/uploads/document/file/4242604/3989288-asignaciones-maximas-de-consumo-2024.pdf?v=1705417674).
- 633 17. Miller JD, Workman CL, Panchang SV, Sneegas G, Adams EA, Young SL, et al. Water  
634 Security and Nutrition: Current Knowledge and Research Opportunities. *Adv Nutr*.  
635 2021;12(6):2525-39.
- 636 18. Hutton G, Chase C. The Knowledge Base for Achieving the Sustainable Development  
637 Goal Targets on Water Supply, Sanitation and Hygiene. *Int J Environ Res Public Health*.  
638 2016;13(6).
- 639 19. Schuster RC, Butler MS, Wutich A, Miller JD, Young SL, Household Water Insecurity  
640 Experiences-Research Coordination N. "If there is no water, we cannot feed our children": The  
641 far-reaching consequences of water insecurity on infant feeding practices and infant health  
642 across 16 low- and middle-income countries. *Am J Hum Biol*. 2020;32(1):e23357.
- 643 20. Akanda AS, Johnson K. Growing water insecurity and dengue burden in the Americas.  
644 *Lancet Planet Health*. 2018;2(5):e190-e1.
- 645 21. Benova L, Cumming O, Campbell OM. Systematic review and meta-analysis: association  
646 between water and sanitation environment and maternal mortality. *Trop Med Int Health*.  
647 2014;19(4):368-87.
- 648 22. Dmitrieva NI, Gagarin A, Liu D, Wu CO, Boehm M. Middle-age high normal serum  
649 sodium as a risk factor for accelerated biological aging, chronic diseases, and premature  
650 mortality. *EBioMedicine*. 2023;87:104404.
- 651 23. Young SL, Bethancourt HJ, Ritter ZR, Frongillo EA. Estimating national, demographic, and  
652 socioeconomic disparities in water insecurity experiences in low-income and middle-income  
653 countries in 2020-21: a cross-sectional, observational study using nationally representative  
654 survey data. *Lancet Planet Health*. 2022;6(11):e880-e91.
- 655 24. Compact UG. Secretariat CWM, editor2017. [May 9, 2024]. Available from:  
656 <https://ceowatermandate.org/posts/water-scarcity-water-stress-water-risk-actually-mean/>.

- 657 25. Urquiza A, Billi M. Documentos de Proyectos Seguridad hídrica y energética en América  
658 Latina y el Caribe: Definición y aproximación territorial para el análisis de brechas y riesgos de la  
659 población. United Nations CEPAL  
660 Cooperacion Alemana; 2020.
- 661 26. Stoler J, Pearson AL, Staddon C, Wutich A, Mack E, Brewis A, et al. Cash water  
662 expenditures are associated with household water insecurity, food insecurity, and perceived  
663 stress in study sites across 20 low- and middle-income countries. *Sci Total Environ*.  
664 2020;716:135881.
- 665 27. Rojas-Perez HL, Diaz-Vasquez MA, Diaz-Manchay RJ, Zena-Nanez S, Failoc-Rojas VE,  
666 Smith D. Nurses' Environmental Practices in Northern Peruvian Hospitals. *Workplace Health Saf*.  
667 2024;72(2):68-74.
- 668 28. WHO GUIDANCE FOR  
669 CLIMATE RESILIENT AND ENVIRONMENTALLY SUSTAINABLE HEALTH CARE FACILITIES. Geneva:  
670 World Health Organization; 2020.
- 671 29. Palinkas LA, O'Donnell ML, Lau W, Wong M. Strategies for Delivering Mental Health  
672 Services in Response to Global Climate Change: A Narrative Review. *Int J Environ Res Public*  
673 *Health*. 2020;17(22).
- 674 30. Climate Change and the Health of Pregnant, Breastfeeding, and Postpartum Women:  
675 U.S. Environmental Protection Agency; [Available from:  
676 [https://www.epa.gov/climateimpacts/climate-change-and-health-pregnant-breastfeeding-and-](https://www.epa.gov/climateimpacts/climate-change-and-health-pregnant-breastfeeding-and-postpartum-women)  
677 [postpartum-women](https://www.epa.gov/climateimpacts/climate-change-and-health-pregnant-breastfeeding-and-postpartum-women).  
678

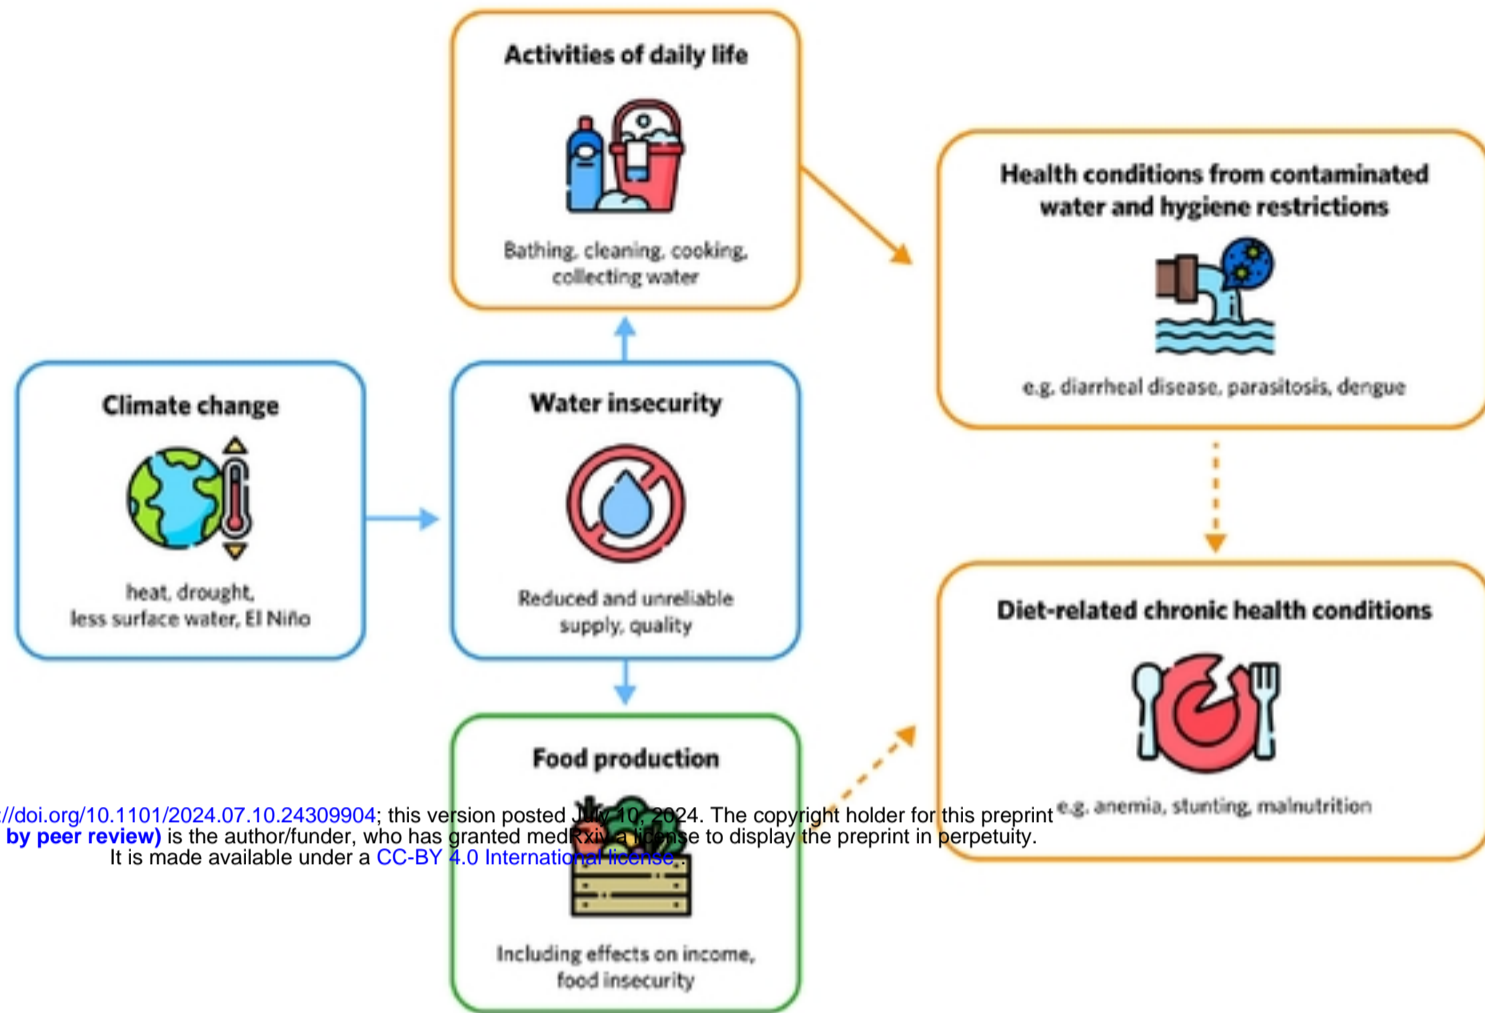

medRxiv preprint doi: <https://doi.org/10.1101/2024.07.10.24309904>; this version posted July 10, 2024. The copyright holder for this preprint (which was not certified by peer review) is the author/funder, who has granted medRxiv a license to display the preprint in perpetuity. It is made available under a [CC-BY 4.0 International license](https://creativecommons.org/licenses/by/4.0/).

Figure 1
